# Supplementary material for: A novel fluorene-containing κ4-P2N2-tetradentate platinum(II) complex
Source: Royal Society of Chemistry journal article supplement (doi:10.1039/b816351k), 2008-11-18

Electronic Supplementary Information for Dalton Trans.

**A Novel Fluorene-Containing  $\kappa^4$ - $P_2N_2$ -Tetradentate Platinum(II) Complex**

Mark R. J. Elsegood, Andrew J. Lake and Martin B. Smith\*

*Department of Chemistry, Loughborough University, Loughborough,*

*Leicestershire, UK, LE11 3TU*

---

\* To whom correspondence should be addressed. E-mail: [m.b.smith@lboro.ac.uk](mailto:m.b.smith@lboro.ac.uk). Tel: +44 (0)1509 222553. Fax: +44 (0)1509 223925.

## Experimental Section

**Materials.** Reactions were carried out under aerobic conditions unless otherwise stated. Dichloromethane was previously distilled over CaH<sub>2</sub> and diethyl ether over sodium/benzophenone. HPLC grade acetone, methanol and other chemicals were obtained from commercial suppliers and used without further purification. The starting materials Ph<sub>2</sub>PCH<sub>2</sub>OH and PtCl<sub>2</sub>(cod) were prepared according to literature procedures.<sup>1,2</sup>

**Instrumentation.** FT–IR spectra were recorded as pressed KBr pellets over the range 4000–200 cm<sup>-1</sup> using a Perkin-Elmer system 2000 FT spectrometer. <sup>1</sup>H NMR and <sup>31</sup>P{<sup>1</sup>H} NMR spectra were recorded on a Bruker DPX-400 FT spectrometer with chemical shifts (δ) reported relative to external TMS or 85% H<sub>3</sub>PO<sub>4</sub>. Coupling constants (*J*) in Hz. All NMR spectra were recorded in CDCl<sub>3</sub> solutions at *ca.* 298 K. Elemental analyses (Perkin-Elmer 2400 CHN or Exeter Analytical, Inc. CE-440 Elemental Analyzers) were performed by the Loughborough University Analytical Service within the Department of Chemistry. Compound **2** was analysed by low-resolution EI and CI (positive ion mode only) using CH<sub>2</sub>Cl<sub>2</sub>/CH<sub>3</sub>OH as the solvent. Compound **3** was analysed (Finnigan MAT 95XP instrument) by low-resolution FAB (LSIMS) in positive ionisation mode using CH<sub>2</sub>Cl<sub>2</sub> as the solvent and a NOBA matrix whereas compound **4** was analysed (Micromass ZQ4000 instrument) by electrospray (ES) in both positive and negative ionisation modes using CH<sub>2</sub>Cl<sub>2</sub>/CH<sub>3</sub>OH as the solvent and CH<sub>3</sub>OH/H<sub>2</sub>O as the liquid flow in which samples were introduced into the source.

**Preparation of Ph<sub>2</sub>PCH<sub>2</sub>NHN=CC<sub>12</sub>H<sub>8</sub>, 1.** The solids H<sub>2</sub>NN=CC<sub>12</sub>H<sub>8</sub> (0.750 g, 3.86 mmol) and Ph<sub>2</sub>PCH<sub>2</sub>OH (1.045 g, 4.83 mmol) in CH<sub>3</sub>OH (HPLC grade, 30 cm<sup>3</sup>) were refluxed, under a nitrogen atmosphere, for *ca.* 24 h. The yellow suspension was left to cool to ambient temperature and the volume concentrated, under reduced pressure, to *ca.* 10–15 cm<sup>3</sup>. The solid was filtered, washed with a small portion of CH<sub>3</sub>OH and dried *in vacuo*. Yield: 1.402 g, 93%. Selected spectroscopic data for **1**: δ<sub>P</sub> (161.8 MHz: CDCl<sub>3</sub>) –16.0 ppm. δ<sub>H</sub> (400 MHz: CDCl<sub>3</sub>) 7.71–7.20 (18H, m, arom. H), 6.55 (1H, br, NH), 4.37 (2H, d, <sup>2</sup>J<sub>PH</sub> 6 Hz, CH<sub>2</sub>) ppm. δ<sub>C</sub> (100.6 MHz: CDCl<sub>3</sub>) 141.04 (s, CN); 136.09 (d, <sup>1</sup>J<sub>CP</sub> 14.1 Hz), 133.24, 133.06, 129.04, 128.82, 128.76 (all PC<sub>6</sub>H<sub>5</sub>); 140.83, 137.86, 137.73, 130.14, 128.94, 127.72, 127.68, 127.32, 124.36, 120.61, 120.35, 119.41 (all C<sub>12</sub>H<sub>8</sub>); 51.4 (d, <sup>1</sup>J<sub>CP</sub> 16.1 Hz, CH<sub>2</sub>) ppm. FT–IR (KBr) ν<sub>NH</sub> 3284 cm<sup>-1</sup>. Found: C, 79.69; H, 5.04; N, 6.68; C<sub>26</sub>H<sub>21</sub>N<sub>2</sub>P requires C, 79.56; H, 5.40; N, 7.14.

**Preparation of Ph<sub>2</sub>P(O)CH<sub>2</sub>NHN=CC<sub>12</sub>H<sub>8</sub>, 2:** To an acetone (HPLC grade, 10 cm<sup>3</sup>) solution of **1** (0.101 g, 0.257 mmol) was added aq. H<sub>2</sub>O<sub>2</sub> (27.5%, 0.1 cm<sup>3</sup>). After stirring for *ca.* 90 min the solution was evaporated to dryness. The residue was extracted into CH<sub>2</sub>Cl<sub>2</sub> (1 cm<sup>3</sup>) and addition of diethyl ether (20 cm<sup>3</sup>) and hexanes (10 cm<sup>3</sup>) gave **2** which was collected by suction filtration and dried *in vacuo*. Yield: 0.079 g, 75%. Selected spectroscopic data for **2**: δ<sub>P</sub> (161.8 MHz: CDCl<sub>3</sub>) 28.6 ppm. δ<sub>H</sub> (400 MHz: CDCl<sub>3</sub>) 7.81–7.13 (18H, m, arom. H), 6.90 (1H, br, NH), 4.40 (2H, s, CH<sub>2</sub>) ppm. FT–IR (KBr) ν<sub>NH</sub> 3244, ν<sub>PO</sub> 1210 cm<sup>-1</sup>. EI–MS 408 [M]<sup>+</sup>. Found: C, 76.27; H, 5.15; N, 7.12; C<sub>26</sub>H<sub>21</sub>N<sub>2</sub>PO requires C, 76.45; H, 5.19; N, 6.86.

Suitable crystals of **2** for X-ray crystallography were grown by the slow evaporation of a CH<sub>3</sub>OH/C<sub>7</sub>H<sub>8</sub> solution of the tertiary phosphine **1**.

**Preparation of cis-PtCl<sub>2</sub>(Ph<sub>2</sub>PCH<sub>2</sub>NHN=CC<sub>12</sub>H<sub>8</sub>)<sub>2</sub>, **3**:** To a CH<sub>2</sub>Cl<sub>2</sub> (10 cm<sup>3</sup>) solution of PtCl<sub>2</sub>(cod) (0.077 g, 0.206 mmol) was added **1** (0.164 g, 0.418 mmol) as a solid in one portion. The yellow solution was stirred for 15 min and concentrated, under reduced pressure, to approx. 2 cm<sup>3</sup>. Addition of diethyl ether (20 cm<sup>3</sup>) gave solid **3** which was collected by suction filtration and dried *in vacuo*. Yield: 0.214 g, 99%. Selected spectroscopic data for **3**: δ<sub>P</sub> (161.8 MHz: CDCl<sub>3</sub>) 9.6 ppm, <sup>1</sup>J<sub>PtP</sub> 3721 Hz. δ<sub>H</sub> (400 MHz: CDCl<sub>3</sub>) 8.34 (2H, d, arom. H), 8.22 (2H, t, NH), 7.72–6.88 (34H, m, arom. H), 4.65 (4H, d, <sup>2</sup>J<sub>PH</sub> 5.6 Hz, CH<sub>2</sub>) ppm. δ<sub>C</sub> (100.6 MHz: CDCl<sub>3</sub>) 140.66 (s, CN); 133.51, 129.24, 128.29 (all PC<sub>6</sub>H<sub>5</sub>); 140.36, 137.95, 137.87, 131.16, 129.97, 128.64, 127.66, 127.31, 125.36, 120.30, 120.14, 119.44 (all C<sub>12</sub>H<sub>8</sub>); 55.9 (m, <sup>1</sup>J<sub>CP</sub> 44.2 Hz, CH<sub>2</sub>) ppm. FT-IR (KBr) ν<sub>NH</sub> 3358, ν<sub>PtCl</sub> 314, 292 cm<sup>-1</sup>. FAB-MS 1015 [M-Cl]<sup>+</sup>. Found: C, 59.55; H, 4.53; N, 4.96; C<sub>52</sub>H<sub>42</sub>N<sub>4</sub>P<sub>2</sub>PtCl<sub>2</sub> requires C, 59.43; H, 4.04; N, 5.33. Suitable crystals for X-ray crystallography were grown by vapour diffusion of Et<sub>2</sub>O into a CDCl<sub>3</sub> solution of **3**.

**Preparation of Pt(κ<sup>4</sup>-P<sub>2</sub>N<sub>2</sub>-Ph<sub>2</sub>PCH=NNCC<sub>12</sub>H<sub>8</sub>)<sub>2</sub>, **4**:** A suspension of **3** (0.300 g, 0.285 mmol) and <sup>t</sup>BuOK (0.071 g, 0.633 mmol) in CH<sub>3</sub>OH (HPLC grade, 20 cm<sup>3</sup>) were refluxed, under a nitrogen atmosphere, for 4 h. The suspension was allowed to cool, the volume reduced by *ca.* half and the solid isolated by filtration under vacuum. Yield: 0.177 g, 64%. Selected spectroscopic data for **4**: δ<sub>P</sub> (161.8 MHz: CDCl<sub>3</sub>) 55.3 ppm, <sup>1</sup>J<sub>PtP</sub> 3300 Hz. δ<sub>H</sub> (400 MHz, 298 K: CDCl<sub>3</sub>) 8.30 (4H, br, arom. H), 7.42–7.26 (20H, m, arom. H), 7.00 (4H, br, arom. H), 6.70 (4H, br, arom. H), 6.20 (4H, br, arom. H), 5.75 (2H, d, <sup>2</sup>J<sub>PH</sub> 32 Hz, CH<sub>2</sub>) ppm. δ<sub>C</sub> (100.6 MHz: CDCl<sub>3</sub>) 92.5 (t, <sup>2</sup>J<sub>CPt</sub> 51.8 Hz, CH) ppm. ES-MS 977 [M-H]<sup>+</sup>. Found: C, 60.54; H, 3.63; N, 4.07; C<sub>52</sub>H<sub>38</sub>N<sub>4</sub>P<sub>2</sub>Pt·3H<sub>2</sub>O requires C, 60.63; H, 4.31; N, 5.44. Suitable crystals for X-ray crystallography were grown by vapour diffusion of Et<sub>2</sub>O into a CH<sub>2</sub>Cl<sub>2</sub>/C<sub>7</sub>H<sub>8</sub> solution of **4**.

## References

1. H. Hellmann, J. Bader, H. Birkner and O. Schumacher, *Justus Liebigs Ann. Chem.*, 1962, **659**, 49.
2. J. X. McDermott, J. F. White and G. M. Whitesides, *J. Am. Chem. Soc.*, 1976, **98**, 6521.

**Additional X-ray Figures (for 2–4) and Variable Temperature  $^1\text{H}$  NMR spectra (for 4)**

**ESIFIG1** for **2** showing the full atom numbering scheme for both independent molecules.

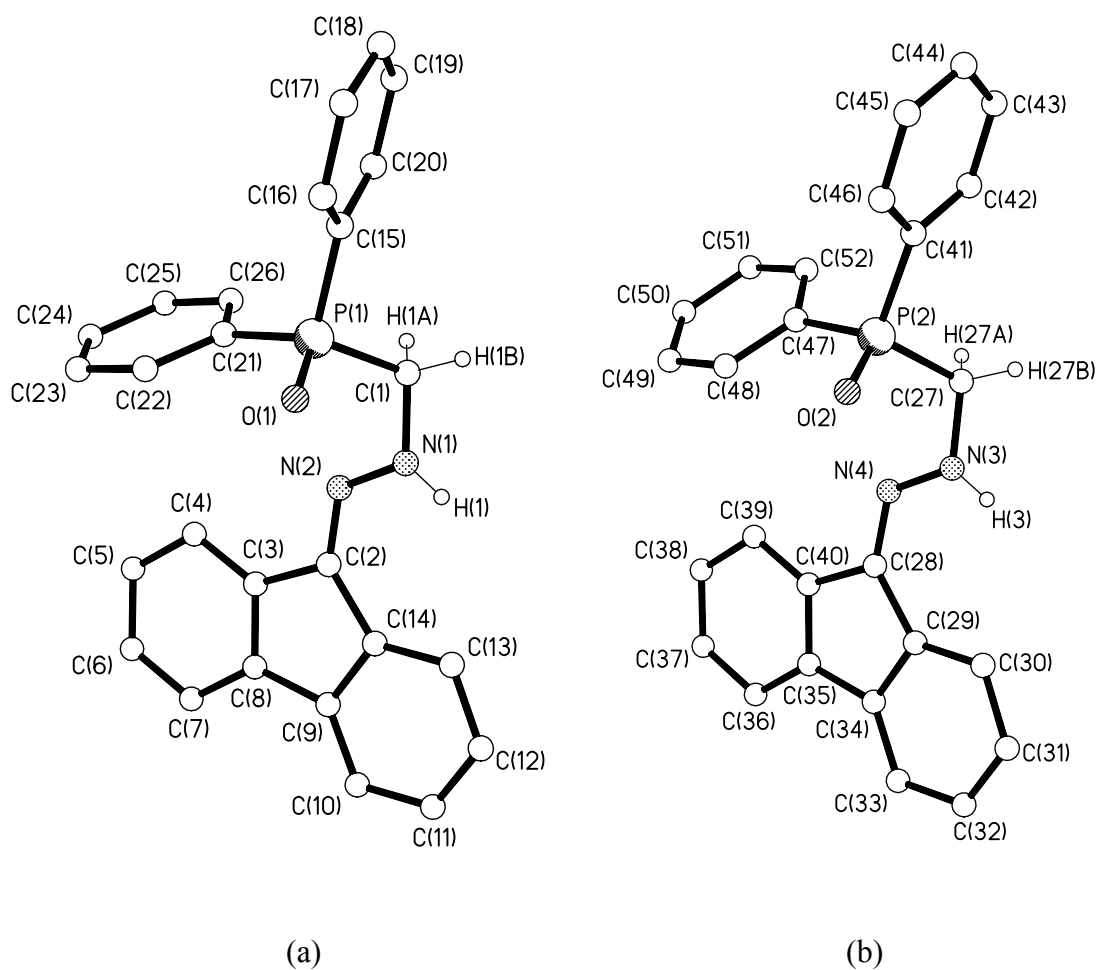

ESIFIG2 for 3 showing the full atom numbering scheme.

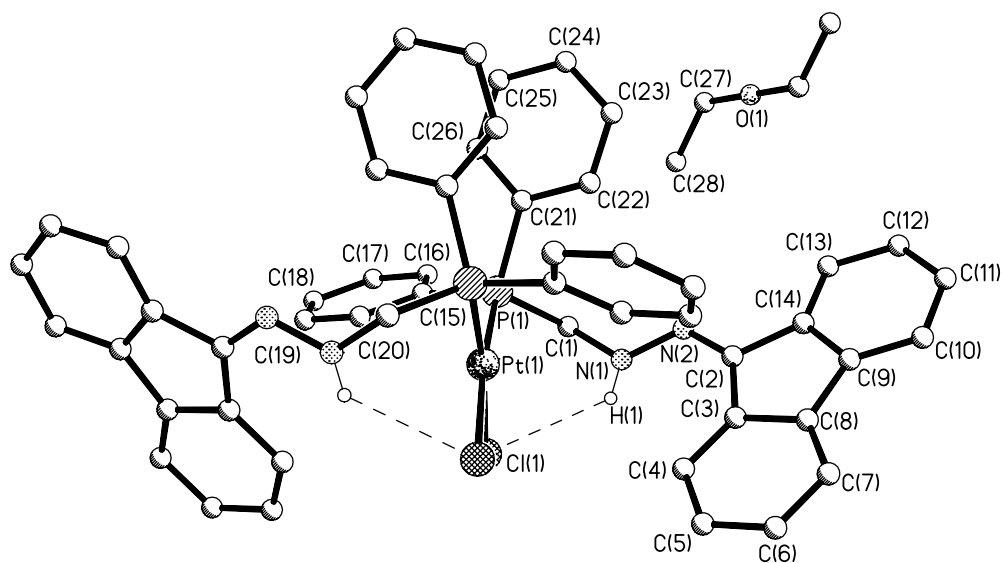

ESIFIG3 for 4 showing the full atom numbering scheme.

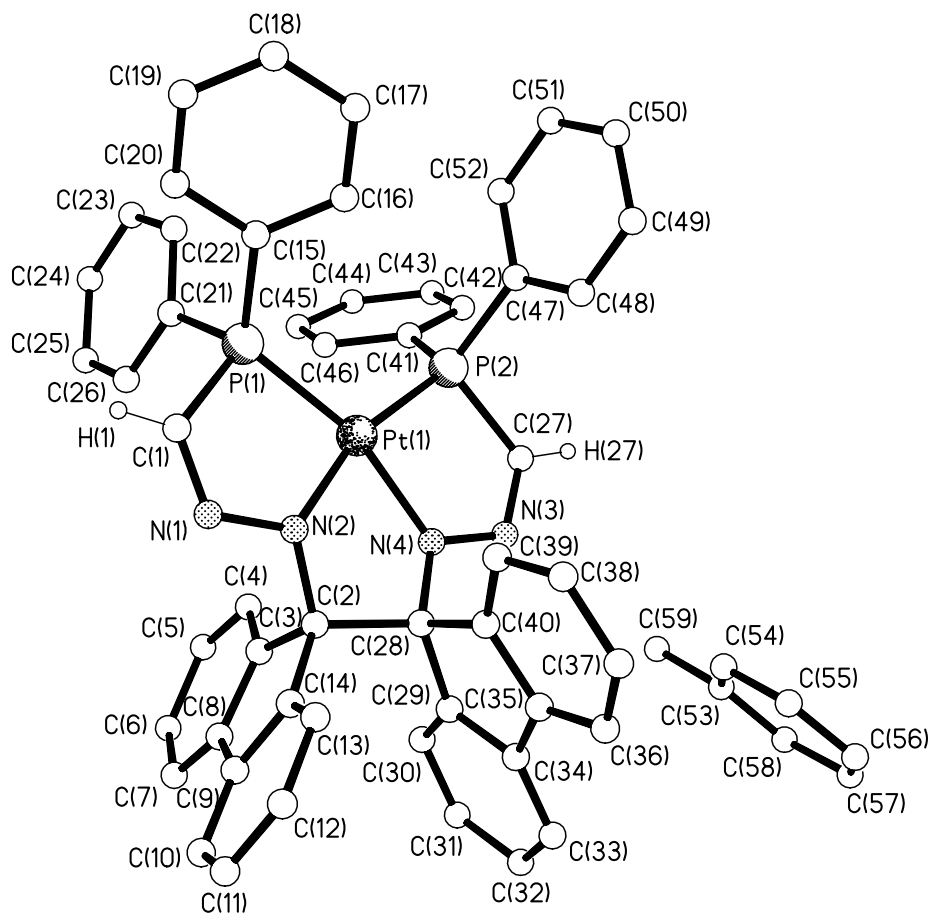

**ESIFIG4** for **4** showing the variable temperature  $^1\text{H}$  NMR spectra ( $\text{CDCl}_3$ ) in the range 20 -  
-40 °C.

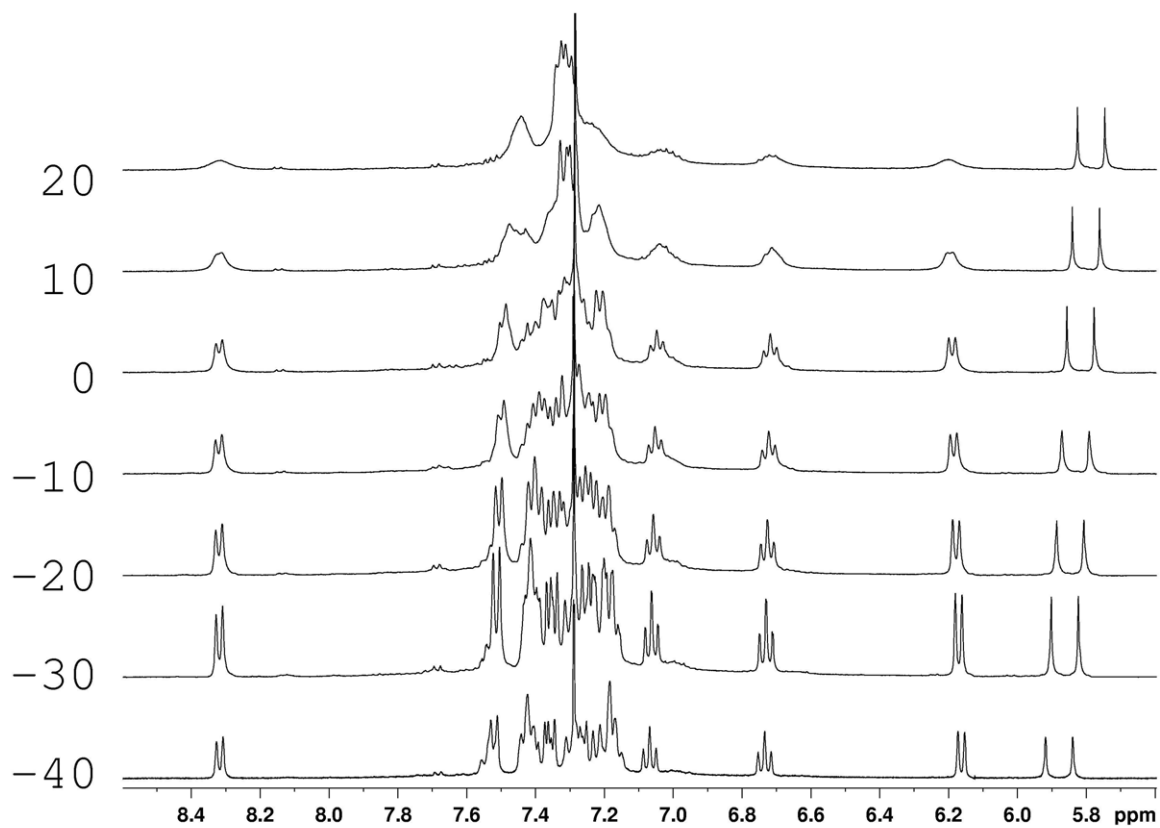

Supplement: b816351k.pdf [file b816351k.pdf]
